# Supplementary material for: Stability Study, Quantification Method and Pharmacokinetics Investigation of a Coumarin–Monoterpene Conjugate Possessing Antiviral Properties against Respiratory Syncytial Virus
Source: MDPI journal article supplement (doi:10.3390/ph15091158), 2022-09-18
Supplement: s1 [file s1]

## Supplementary materials

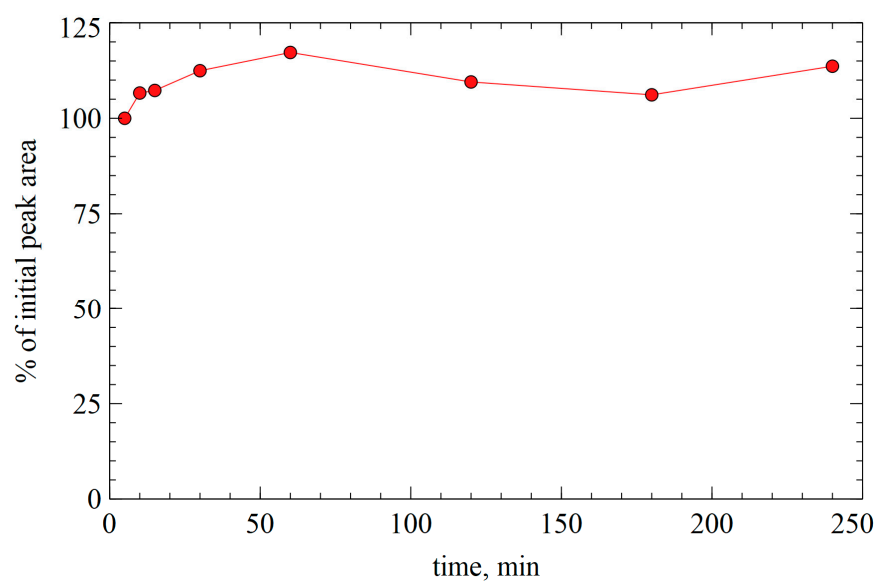

**Figure S1.** Time dependence of the peak area on the chromatogram of compound K-142 in mouse whole blood samples.

Calibration for K-142:  $y = 4.93412e-4 x + 8.77760e-4$  ( $r = 0.99546$ ) (weighting:  $1 / x^2$ )

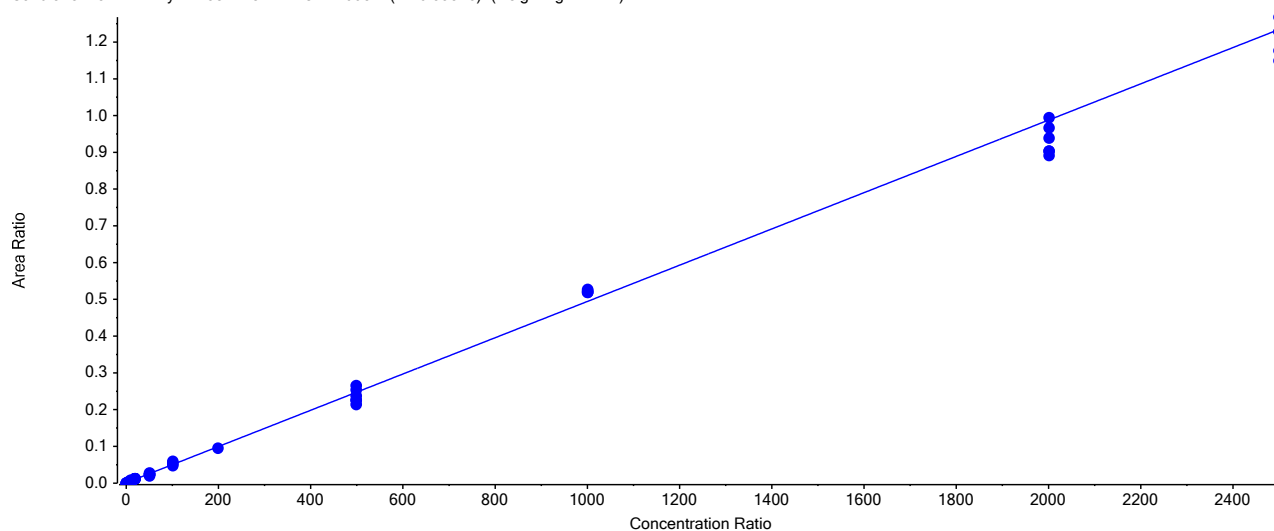

**Figure S2.** Calibration plot of the K-142-to-IS peak area ratio to concentration of K-142 in mice blood.

**Table S1.** Multiple reaction monitoring parameters for detection of K-142 and 2-Ad (IS)

| Analyte and its parent ion<br>(Q1 m/z, Da) | Product ion<br>(Q3 m/z, Da) | DP (V) | CE (V) | CXP (V) |
|--------------------------------------------|-----------------------------|--------|--------|---------|
| K-142 (351.2)                              | 217.1                       | 151.0  | 35.0   | 12.0    |
| 2-Ad (152.2)                               | 93.1                        | 16.0   | 35.0   | 14.0    |
|                                            | 107.2                       | 21.0   | 37.0   | 8.0     |

**Table S2.** Results of precision and accuracy for determination of K-142 in quality control samples analysis

| QC sample (ng/mL) | Average found,<br>ng/mL | Accuracy,<br>% | CV, % |
|-------------------|-------------------------|----------------|-------|
| Intra-day         |                         |                |       |
| LLOQ (5)          | 5.28                    | 105.6          | 5.1   |
| QCL (15)          | 16.04                   | 107.0          | 8.8   |
| QCM (1250)        | 1157                    | 92.6           | 3.5   |
| QCH (2250)        | 2082                    | 92.1           | 5.2   |
| Inter-day         |                         |                |       |
| LLOQ (5)          | 5.31                    | 106.2          | 5.5   |
| QCL (15)          | 15.92                   | 106.3          | 8.9   |
| QCM (1250)        | 1225                    | 98.1           | 11.4  |
| QCH (2250)        | 2107                    | 93.6           | 7.1   |
